# Supplementary material
Source: HighWire-hosted journal article supplement (https://bjgp.org/highwire/filestream/38611/field_highwire_adjunct_files/0/bjgp20X709337_Suppl.pdf)

**Figure S1: NEWS score card**

| PHYSIOLOGICAL PARAMETERS | 3     | 2        | 1           | 0           | 1           | 2         | 3          |
|--------------------------|-------|----------|-------------|-------------|-------------|-----------|------------|
| Respiration Rate         | ≤8    |          | 9 - 11      | 12 - 20     |             | 21 - 24   | ≥25        |
| Oxygen Saturations       | ≤91   | 92 - 93  | 94 - 95     | ≥96         |             |           |            |
| Any Supplemental Oxygen  |       | Yes      |             | No          |             |           |            |
| Temperature              | ≤35.0 |          | 35.1 - 36.0 | 36.1 - 38.0 | 38.1 - 39.0 | ≥39.1     |            |
| Systolic BP              | ≤90   | 91 - 100 | 101 - 110   | 111 - 219   |             |           | ≥220       |
| Heart Rate               | ≤40   |          | 41 - 50     | 51 - 90     | 91 - 110    | 111 - 130 | ≥131       |
| Level of Consciousness   |       |          |             | A           |             |           | V, P, or U |

**Figure S2: NEWS2 score card**

| Physiological parameter        | 3     | 2      | 1         | Score 0             | 1               | 2               | 3             |
|--------------------------------|-------|--------|-----------|---------------------|-----------------|-----------------|---------------|
| Respiration rate (per minute)  | ≤8    |        | 9-11      | 12-20               |                 | 21-24           | ≥25           |
| SpO <sub>2</sub> Scale 1 (%)   | ≤91   | 92-93  | 94-95     | ≥96                 |                 |                 |               |
| SpO <sub>2</sub> Scale 2 (%)   | ≤83   | 84-85  | 86-87     | 88-92<br>≥93 on air | 93-94 on oxygen | 95-96 on oxygen | ≥97 on oxygen |
| Air or oxygen?                 |       | Oxygen |           | Air                 |                 |                 |               |
| Systolic blood pressure (mmHg) | ≤90   | 91-100 | 101-110   | 111-219             |                 |                 | ≥220          |
| Pulse (per minute)             | ≤40   |        | 41-50     | 51-90               | 91-110          | 111-130         | ≥131          |
| Consciousness                  |       |        |           | Alert               |                 |                 | CVPU          |
| Temperature (°C)               | ≤35.0 |        | 35.1-36.0 | 36.1-38.0           | 38.1-39.0       | ≥39.1           |               |

**Figure S3: Review by specialty registrar or consultant by NEWS on referral**

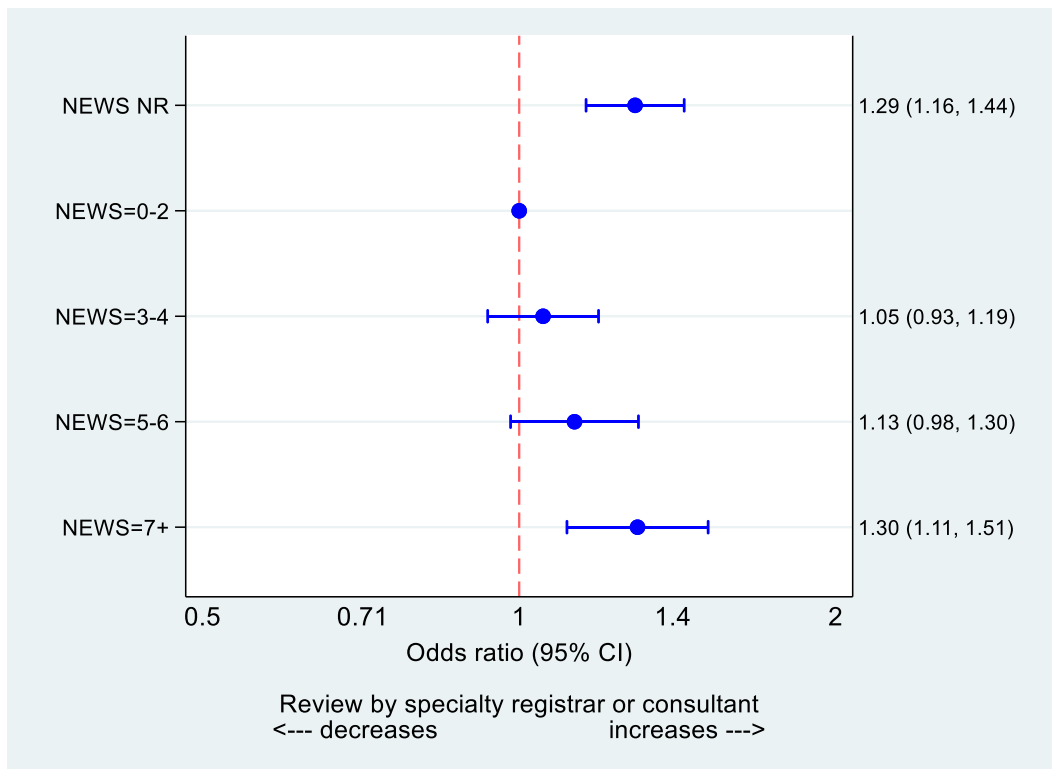

Patients not reviewed by specialty registrar or consultant were reviewed by foundation year 1, foundation year 2, senior house officer, GP or 'other' doctors (see Table 1 for details).

**Figure S4: ICU admission and/or mortality by NEWS on referral**

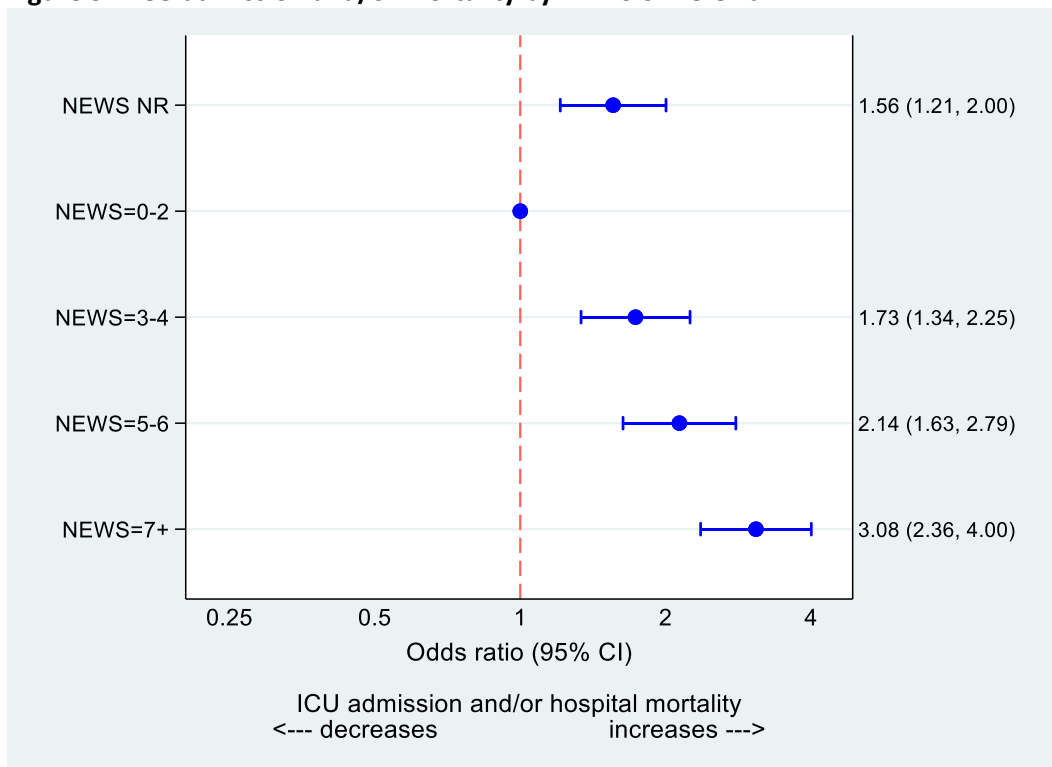

**Figure S5: Suspicion of Sepsis**

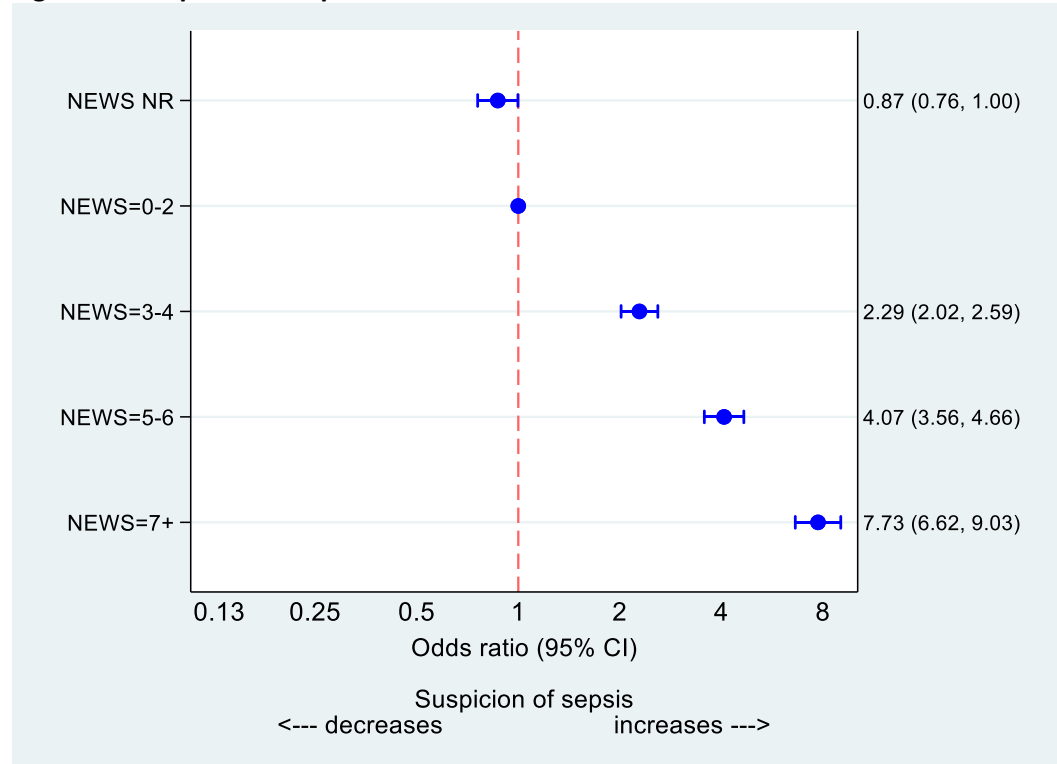

**Figure S6: 30-day mortality by NEWS on referral**

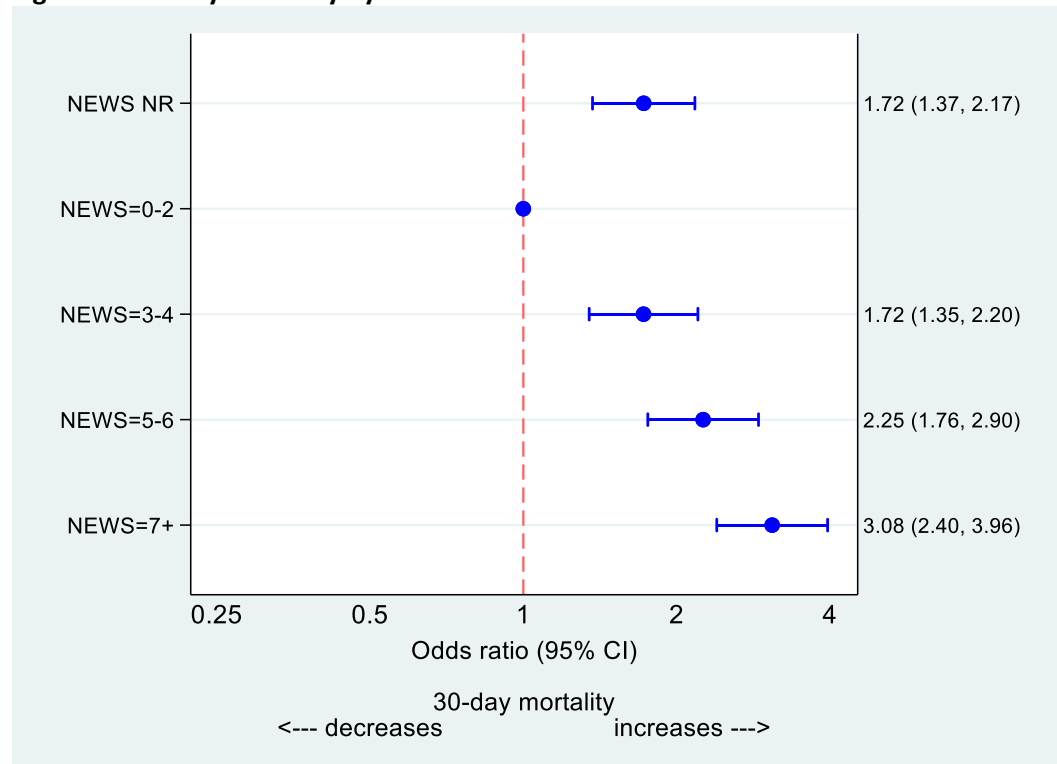

Supplement: bjgp20X709337_Suppl.pdf [file bjgp20X709337_Suppl.pdf]
